# Supplementary material for: The Portal Theory Supported by Venous Drainage–Selective Fat Transplantation
Source: PubMed Central journal article supplement — Diabetes. 2010 Oct 18;60(1):56–63. doi: 10.2337/db10-0697 (PMC3012197; doi:10.2337/db10-0697), 2010-10-18
Supplement: supp_db10-0697_db100697onlineappendix.pdf [file supp_db10-0697_db100697onlineappendix.pdf]

**Supplementary Table S1.** *Metabolic Characteristics of mice receiving a portal fat transplant from IL6KO mice*

|                               | <i>Sham</i> | <i>pTx</i>  |
|-------------------------------|-------------|-------------|
| <u>Before transplantation</u> |             |             |
| Body weight (g)               | 28.8 ± 1.8  | 27.0 ± 0.9  |
| Fat pad weight (mg):          |             |             |
| - Transplant                  |             | 255 ± 29    |
| <u>At sacrifice</u>           |             |             |
| Body weight (g)               | 30.3 ± 1.4  | 27.1 ± 0.4  |
| Fat pad weight (mg):          |             |             |
| - Transplant                  |             | 149 ± 26    |
| - Epididymidal                | 292 ± 64    | 408 ± 84    |
| - Mesenteric                  | 141 ± 23    | 130 ± 17    |
| - Retroperitoneal             | 91 ± 16     | 93 ± 20     |
| - Inguinal                    | 171 ± 51    | 221 ± 66    |
| Glucose (mM)                  | 3.5 ± 0.3   | 3.8 ± 0.3   |
| FFA (mM)                      | 0.89 ± 0.25 | 0.88 ± 0.15 |

Results are the means ± SEM of three animals. Blood samples were taken after overnight fasting.

**Supplementary Figure S1.** *Blood glucose concentrations and glucose infusion rate during hyperinsulinemic-euglycemic clamp*

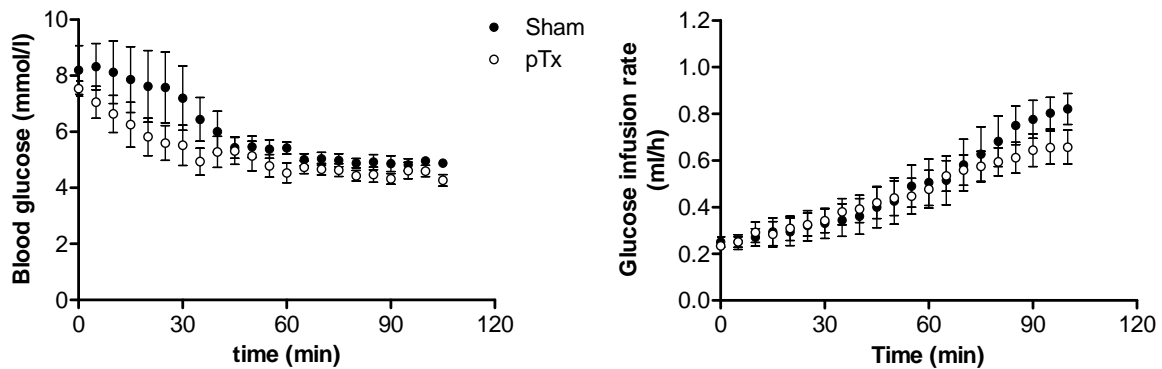

Blood glucose levels were clamped upon insulin infusion at about 5 mmol/l in mice receiving portal drained fat pads (○) and in sham-operated mice (●) (left graph). In order to maintain euglycemia, glucose infusion rate was adjusted over time (right graph).

**Supplementary Figure S2. Similar IL-6 plasma concentrations in sham operated and caval transplanted mice**

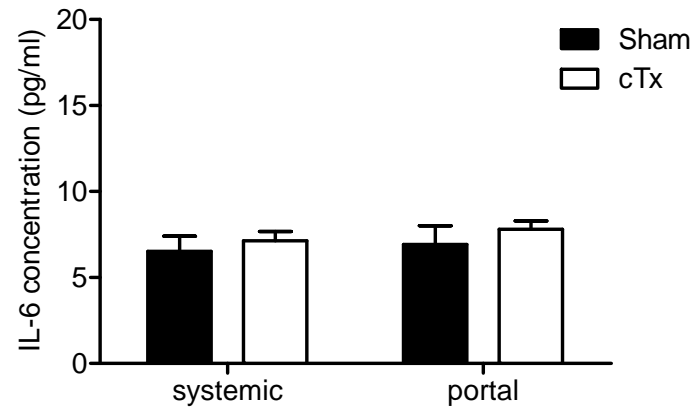

IL-6 was measured in systemic and portal plasma samples of mice receiving a caval drained fat transplant (cTx) and in sham operated mice. Results are the mean  $\pm$  SEM of 5-10 animals.

**Supplementary Figure S3. Intraperitoneal glucose tolerance test in mice receiving a portal drained peritoneal tissue transplant**

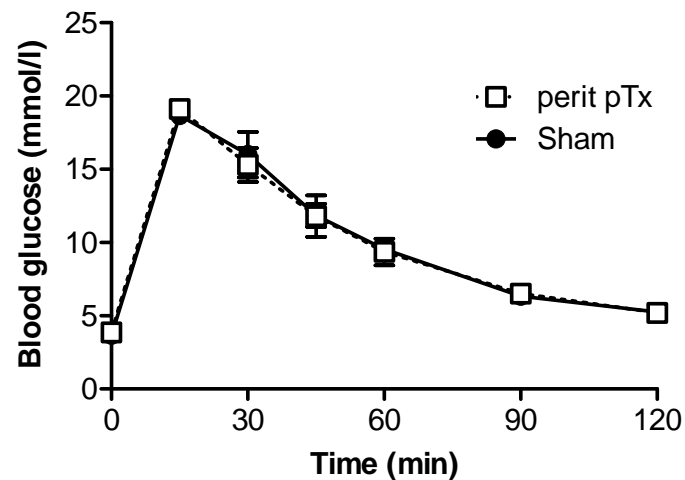

Intraperitoneal glucose tolerance test (2 g glucose/kg body weight) was performed four weeks after surgical procedure in mice receiving portal drained peritoneal tissue transplants including no fat tissue (perit pTx;  $\square$ ) or in sham-operated mice ( $\bullet$ ) after a overnight fast. Results are expressed as mean blood glucose concentration  $\pm$  SEM of 4-5 animals.

**Supplementary Figure S4. Decreased expression of inflammatory markers in fat transplants from IL-6 knockout mice**

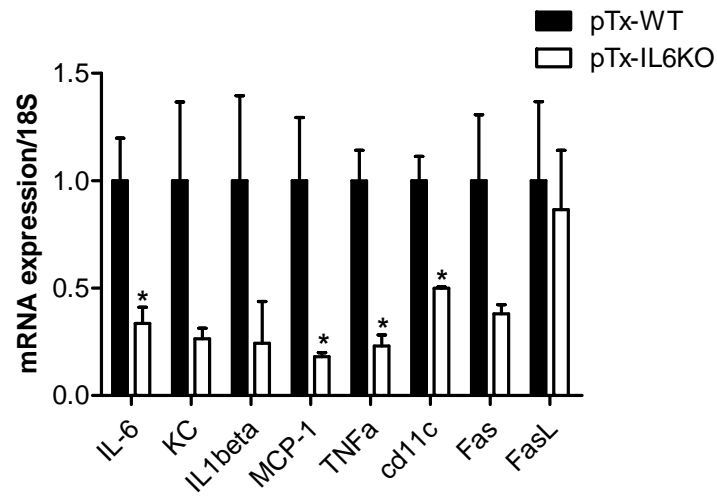

Five weeks after transplantation portal transplanted fat pads of mice receiving the transplant from wildtype (pTx-WT) or IL-6 knockout mice (pTx-IL6KO) were harvested and rtPCR was performed. Results are the mean  $\pm$  SEM of 3-4 animals. \* $p < 0.05$  (Student's *t* test)
